# Supplementary material for: Investigation of reward learning and feedback sensitivity in non-clinical participants with a history of early life stress
Source: bioRxiv or medRxiv preprint supplement (doi:10.1101/2020.11.13.380444), 2021-06-09
Supplement: Supplementary file [file media-1.pdf]

**Investigation of reward learning and feedback sensitivity in non-clinical participants with a history of early life stress.**

**Matthew P Wilkinson, Chloe L Slaney, Jack R Mellor, Emma S J Robinson**

**Supplementary Material**

## **Supplementary Methods – Directly rewarded PRT in a control population.**

An additional cohort of 81 participants were recruited to assess the online PRT using direct monetary compensation.

### **Participants**

Eligibility Criteria were: aged 18 – 45 years, fluent in English, resident in the UK, normal or corrected-to-normal vision (self-report), no current or previous diagnosed mental health condition (self-report), reported using a macOS or windows 10 operating system, not taken part in previous prolific studies from the same researcher (i.e., a prolific blacklist was employed) and scored > 65% “correct” on a different reward learning task (the reward learning assay, not discussed here).

### **Procedure**

All participants completed a different reward learning task (the reward learning assay) over five consecutive days. On the final day, participants also completed the Probabilistic Reward Task (PRT)[1], Snaitth-Hamilton Pleasure Scale (SHAPS)[2] and Beck Depression Inventory (BDI; suicide question removed)[3].

### **Probabilistic Reward Task**

The PRT (Pizzagalli et al., 2005) available on the Millisecond test library was employed (using Inquisit v6). The only change made to the task was the monetary amount of reward: participants were informed that they could win up to £5 on this task. Specifically, they were informed that if a correct response is rewarded they will earn four pence.

## Analysis

Only participants with a minimal BDI score ( $<13$ ) and normal SHAPS score ( $\leq 2$ ) were included in final analysis. The output variables logB and logD were calculated as described elsewhere [1]. Data were both analysed across all blocks for a variable using Friedman tests due to the non-normality of data with response bias data also being compared against a hypothetical mean of zero for each block using Wilcoxon signed rank tests.

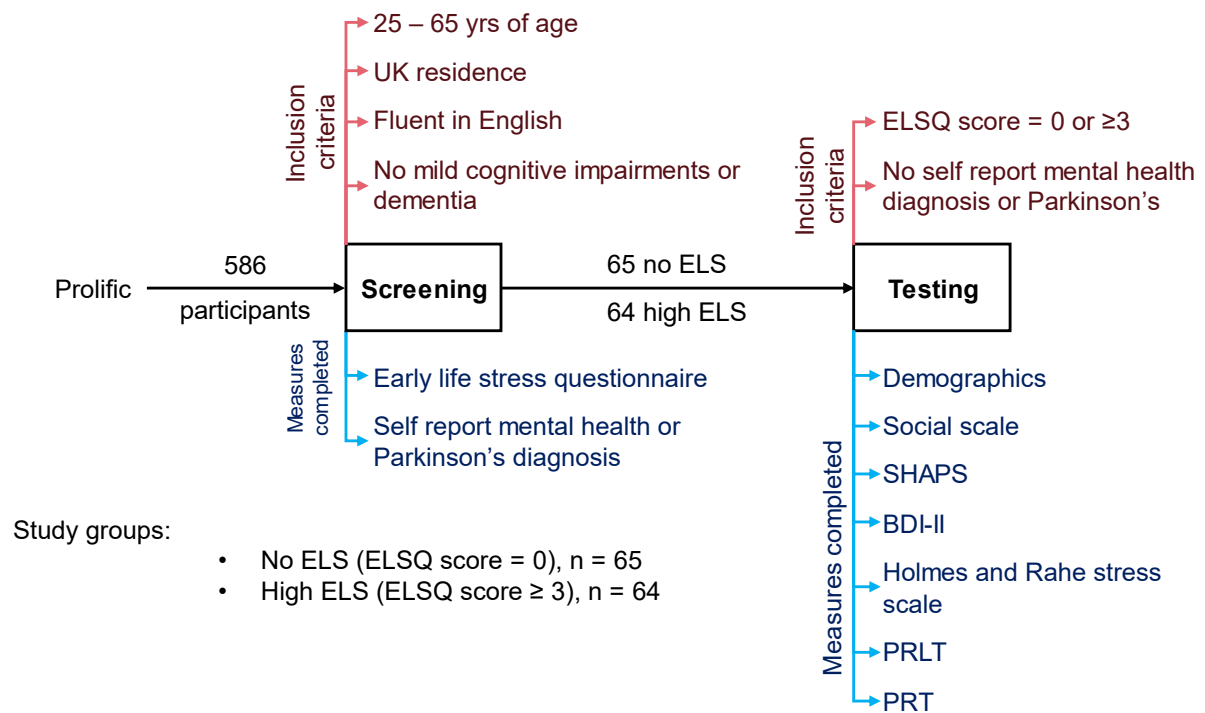

**Fig S1 Study overview.** Participants were screened by ELSQ score and then formed into two study groups: no ELS and high ELS.

| Component | Explained variance (%) | No ELS       | High ELS     | Test statistic           | P value       |
|-----------|------------------------|--------------|--------------|--------------------------|---------------|
| 1         | 94.6                   | 4.32 ± 0.24  | 5.65 ± 0.25  | t <sub>127</sub> = -3.86 | <b>0.0002</b> |
| 2         | 3.4                    | -0.19 ± 0.21 | 0.20 ± 0.24  | t <sub>127</sub> = -1.22 | 0.226         |
| 3         | 2.0                    | 0.21 ± 0.15  | -0.22 ± 0.18 | t <sub>127</sub> = 1.79  | 0.076         |

**Table S1 Principal component analysis of social scale, SHAPS and BDI-II scores.** The mean ± standard error are shown for each group with the relevant statistical comparison.

|              | Principle component |       |        |
|--------------|---------------------|-------|--------|
|              | 1                   | 2     | 3      |
| Social scale | -0.07               | -0.40 | 0.91   |
| BDI-II       | 0.98                | -0.18 | -0.003 |
| SHAPS        | 0.17                | 0.90  | 0.40   |

**Table S2 Principal component analysis component loadings.**

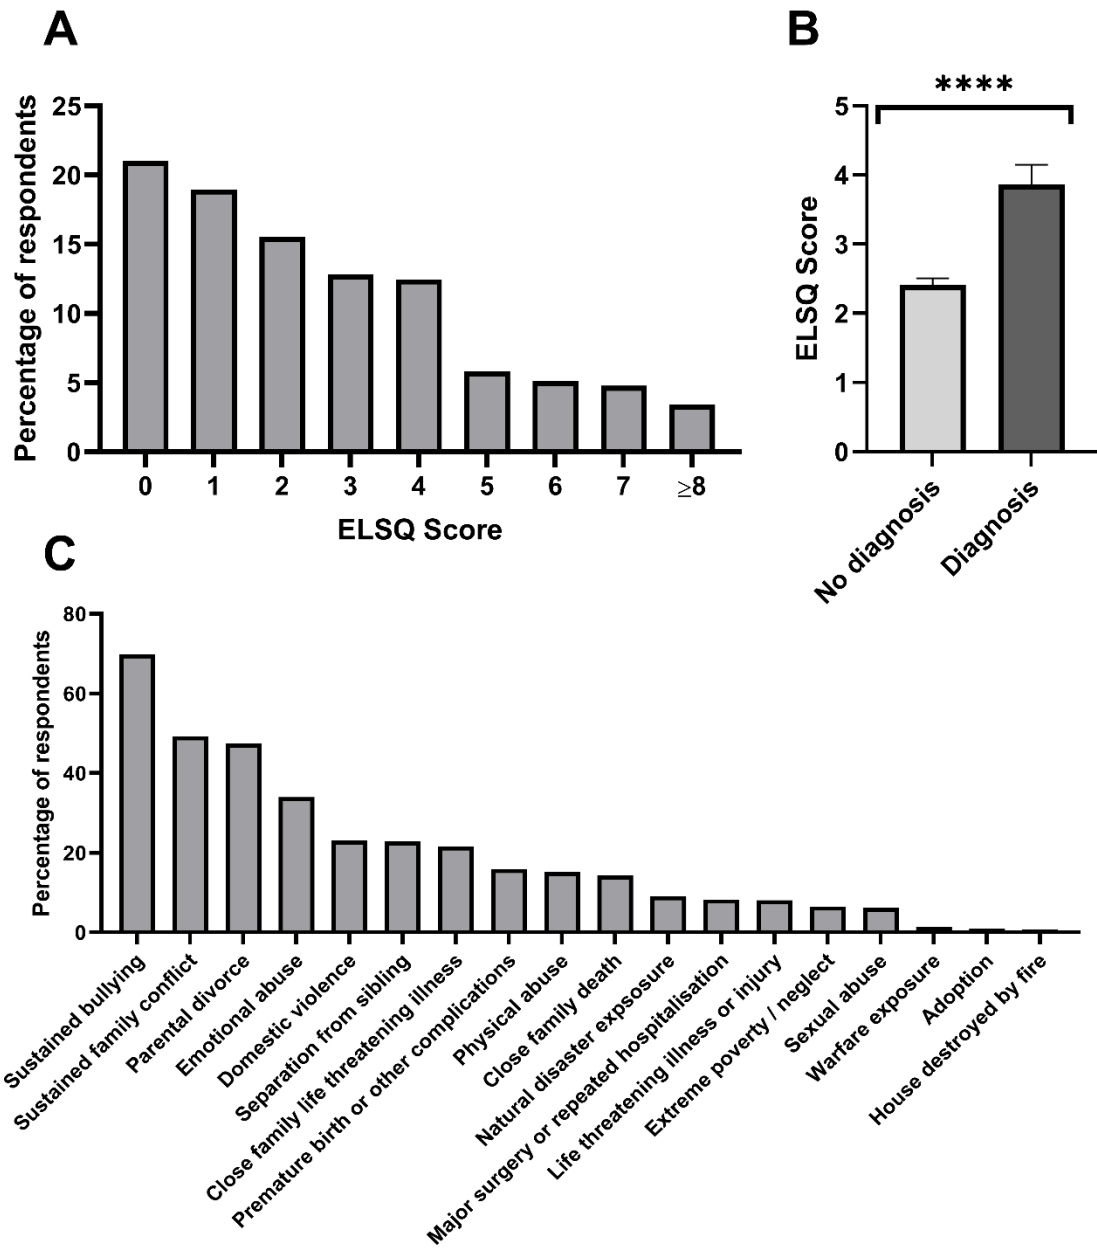

**Fig S2 Early life stress in an online study population. (A)** ELSQ scores in the study population. **(B)** Mental health disorder / Parkinson’s self-report diagnosis by ELSQ score (Mann-Whitney,  $U = 15725$ ,  $p < 0.0001$ ).  $N = 586$  participants. **(C)** ELSQ scores in the study population split by modality of adverse childhood experience.

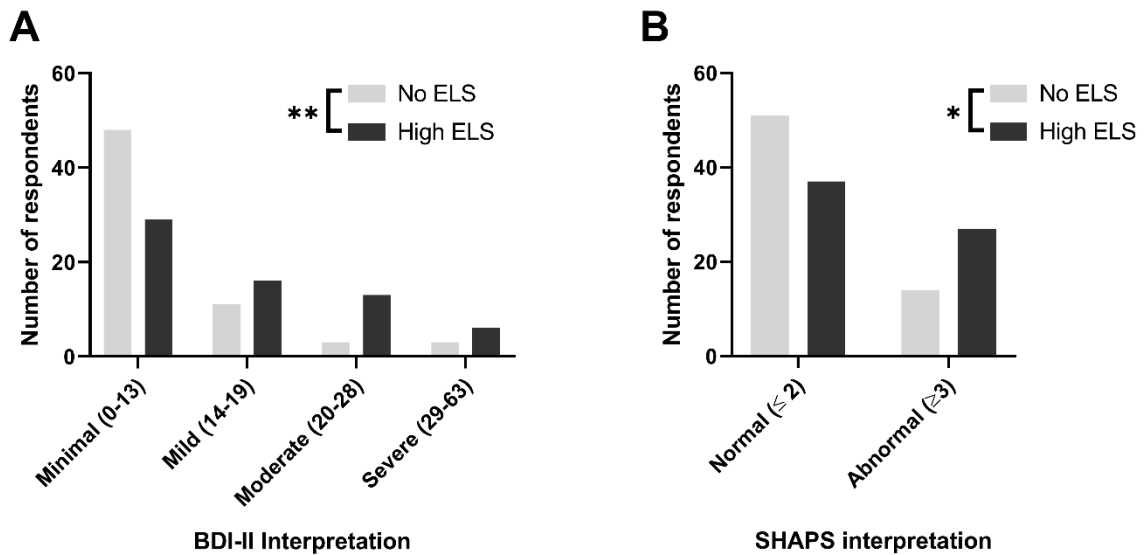

**Fig S3 Interpretation of BDI-II and SHAPS scores in the no and high ELS populations.** Scores were interpreted following Beck et al., 1996 and Snaith et al., 1995. (A) BDI-II split by severity of depression ( $\chi^2$ ,  $\chi^2(3) = 12.9$ ,  $p = 0.005$ ) and (B) SHAPS split by normal or abnormal hedonic responses ( $\chi^2$ ,  $\chi^2(1) = 6.3$ ,  $p = 0.012$ ). N = 129 participants (65 no ELS, 64 high ELS).

| Current trial | Previous trial      | No ELS     | High ELS   | Test statistic | p            |
|---------------|---------------------|------------|------------|----------------|--------------|
| Lean          | Rich - rewarded     | 16.8 ± 2.1 | 18.4 ± 2.2 | U = 1966       | 0.59         |
| Lean          | Rich - not rewarded | 16.1 ± 1.8 | 18.6 ± 1.8 | U = 1744       | 0.11         |
| Lean          | Lean - rewarded     | 19.3 ± 2.1 | 20.5 ± 2.0 | U = 1928       | 0.47         |
| Lean          | Lean - not rewarded | 16.8 ± 1.6 | 21.2 ± 1.8 | U = 1928       | 0.097        |
| Rich          | Rich - rewarded     | 13.1 ± 1.5 | 18.3 ± 2.1 | U = 1697.5     | 0.071        |
| Rich          | Rich - not rewarded | 14.2 ± 1.6 | 20.0 ± 2.1 | U = 1597.5     | <b>0.023</b> |
| Rich          | Lean - rewarded     | 13.1 ± 1.4 | 15.5 ± 1.7 | U = 1814       | 0.330        |
| Rich          | Lean - not rewarded | 14.2 ± 1.4 | 19.6 ± 1.9 | U = 1644.5     | <b>0.040</b> |

**Table S3 Miss-rates, the chance of mis-categorising a stimulus, by previous trial.** Data is shown as mean ± standard error and significant p-values are shown in bold.

| <b>Measure</b>             | <b>Control population (n = 56)</b> |
|----------------------------|------------------------------------|
| Sex (% Male)               | 51.8                               |
| Age (years)                | 31 ± 1.1                           |
| Employment (% full time)   | 48.2                               |
| Student status (% student) | 28.6                               |
| BDI                        | 4.1 ± 0.3                          |
| SHAPS                      | 0.30 ± 0.09                        |
| SHAPS-C                    | 20.7 ± 0.6                         |

**Table S4. Demographic and self-report measures in the directly rewarded PRT control population.**

Values are shown for each group as mean ± standard error where appropriate.



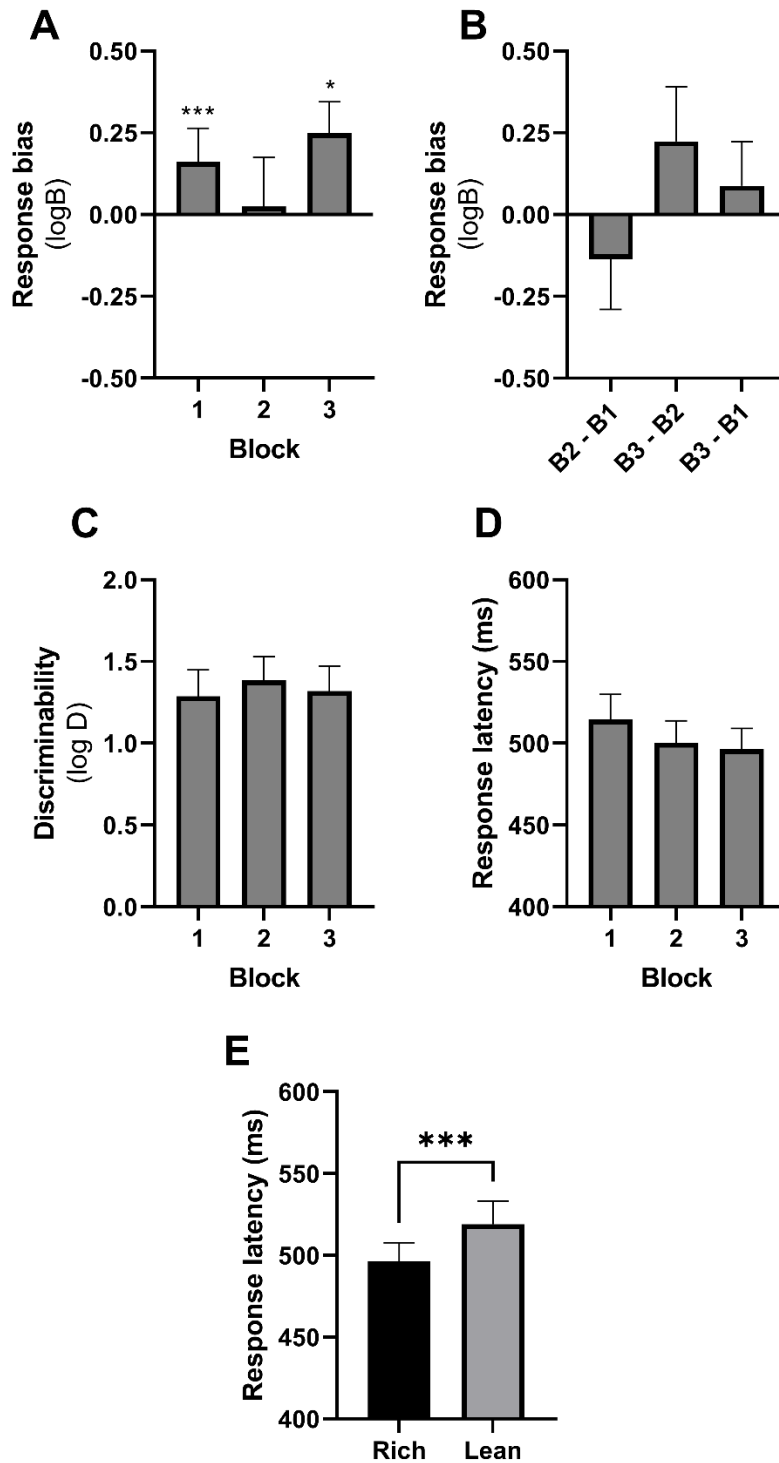

**Fig S4. Direct monetary reward in the PRT using a control population led to a reward induced bias.** (A) While no overall effect of block was observed, a response bias was observed in blocks 1 and 3 (Wilcoxon signed ranks test, block 1:  $W = 1087.5$ ,  $p = 0.001$ , block 3:  $W = 916.5$ ,  $p = 0.038$ ). (B) There was little evidence for response bias strengthening across blocks. Discriminability (C) and response latency (D) did not appear to change over the course of a session. (E) Participants were faster to respond to the rich stimulus than lean (Wilcoxon matched pairs signed ranks test,  $W = 814$ ,  $p = 0.0007$ ).  $N = 56$  participants.

## References

1. Pizzagalli DA, Jahn AL, O'Shea JP. Toward an objective characterization of an anhedonic phenotype: A signal-detection approach. *Biol Psychiatry*. 2005;57: 319–327. doi:10.1016/j.biopsych.2004.11.026
2. Snaith RP, Hamilton M, Morley S, Humayan A, Hargreaves D, Trigwell P. A scale for the assessment of hedonic tone the Snaith-Hamilton Pleasure Scale. *Br J Psychiatry*. 1995;167: 99–103. doi:10.1192/bjp.167.1.99
3. Beck AT, Ward CH, Mendelson M, Mock J, Erbaugh J. An inventory for measuring depression. *Archives of General Psychiatry*. US: American Medical Association; 1961. pp. 561–571. doi:10.1001/archpsyc.1961.01710120031004
4. Beck A, Steer R, Brown G. *Beck Depression Inventory*. Second Edition. San Antonio, TX; 1996.
